# Supplementary material for: Frontal Conversion and Uniformity in 3D Printing by Photopolymerisation
Source: MDPI journal article supplement (doi:10.3390/ma9090760), 2016-09-07
Supplement: s1 [file s1]

# Supplementary Materials: Frontal Conversion and Uniformity in 3D Printing by Photopolymerisation

Alessandra Vitale and João T. Cabral

## Brief Summary of the Modelling Approach

We model the spatio-temporal evolution of the photopolymerisation process [1–3] by introducing rate laws for the monomer-to-polymer conversion  $\phi(z,t)$ , and for the light intensity  $I(z,t)$ . The rate of change of  $\phi(z,t)$  is taken to be proportional to the fraction of unconverted  $(1 - \phi(z,t))$  and the light intensity  $I(z,t)$  at the relevant depth  $z$  and time  $t$ , in addition to an overall reaction conversion rate  $K$ :

$$\partial\phi(z,t)/\partial t = K [1 - \phi(z,t)] I(z,t) \quad (1)$$

Upon photopolymerisation, the material comprises both converted and unconverted monomer, whose optical attenuation coefficients  $\mu$  may differ. To account for this evolving optical attenuation, we write a generalized Beer-Lambert expression:

$$\partial I(z,t)/\partial z = -\bar{\mu}(z,t) I(z,t) \quad (2)$$

where the effective attenuation coefficient reads:

$$\bar{\mu}(z,t) \equiv \mu_0 [1 - \phi(z,t)] + \mu_{\infty} \phi(z,t) \quad (3)$$

Corresponding to the neat attenuation coefficients of the unconverted and converted materials, weighted by their respective composition fractions, at a given time  $t$  and depth  $z$ . Evidently, in the limit of small variations in  $\mu$  between monomer and polymer, the usual Beer-Lambert law is recovered:

$$I(z) = I(0) \exp(-\bar{\mu}z) \quad (4)$$

The main (analytical) solutions of this photoinvariant limit of our model are given in Equations (1) and (2) of the main paper. The spatio-temporal dependence of the conversion profile is plotted in Figure S1.

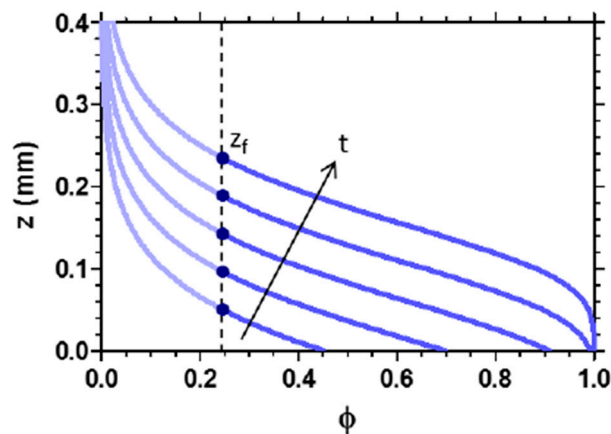

**Figure S1.** Conversion  $\phi$  profiles along the sample depth  $z$  for increasing UV irradiation time  $t$ , which corresponds to an increasing sample thickness  $z_f$ .

In addition, an induction time is required for solidification, corresponding to the time interval associated to  $\phi(z,t)$  first reaching the critical  $\phi_c$  for solidification:

$$\tau \equiv \ln[1/(1 - \phi_c)]/KI_0 \quad (5)$$

and an equivalent expression can be written for the critical dose  $d_c$ .

The interfacial width  $W$  [3,4], characterizing the extent of the interface between the monomer and polymer network can be defined as:

$$W = \frac{1}{|d\phi/dz|_{\max}} \quad (6)$$

where  $d\phi/dz$  is the maximum slope of the profile (at the inflection point), yielding  $W = e/\mu$  and thus providing an effective means of estimating the steepness of the conversion profile. In the main paper, the interplay between this interfacial width and  $\Delta z$  of stereolithography is discussed in detail.

In a series of publications, the model has been extended to include mass diffusion [4] and heat generation and diffusion [5] during FPP, giving rise to a number of important corrections to our ‘minimal model’. Nevertheless, the ‘minimal model’ reported above has been found to quantitatively describe a number of thiol-ene, both neat and filled systems, not only in terms of the kinetics of front position [1,2,6], but also the exact interfacial profile [6,7]. We have introduced a unified description for FPP that appears generally applicable to a wide range of free radical systems [7].

## References

1. Cabral, J.T.; Hudson, S.D.; Harrison, C.; Douglas, J.F. Frontal photopolymerization for microfluidic applications. *Langmuir* **2004**, *20*, 10020–10029.
2. Cabral, J.T.; Douglas, J.F. Propagating waves of network formation induced by light. *Polymer* **2005**, *46*, 4230–4241.
3. Warren, J.A.; Cabral, J.T.; Douglas, J.F. Solution of a field theory model of frontal photopolymerization. *Phys. Rev. E* **2005**, *72*, 021801.
4. Hennessy, M.G.; Vitale, A.; Matar, O.K.; Cabral, J.T. Controlling frontal photopolymerization with optical attenuation and mass diffusion. *Phys. Rev. E* **2015**, *91*, 062402.
5. Hennessy, M.G.; Vitale, A.; Cabral, J.T.; Matar, O.K. Role of heat generation and thermal diffusion during frontal photopolymerization. *Phys. Rev. E* **2015**, *92*, 022403.
6. Vitale, A.; Hennessy, M.G.; Matar, O.K.; Cabral, J.T. Interfacial Profile and Propagation of Frontal Photopolymerization Waves. *Macromolecules* **2015**, *48*, 198–205.
7. Vitale, A.; Hennessy, M.G.; Matar, O.K.; Cabral, J.T. A Unified Approach for Patterning via Frontal Photopolymerization. *Adv. Mater.* **2015**, *27*, 6118–6124.
